# Supplementary material for: A solvent-dependent chemosensor for fluorimetric detection of Hg2+ and colorimetric detection of Cu2+ based on a new diarylethene with a rhodamine B unit
Source: Royal Society of Chemistry journal article supplement (doi:10.1039/c9ra08557b), 2019-01-01
Supplement: c9ra08557b1.pdf [file c9ra08557b1.pdf]

**Fig. S1.**  $^1\text{H}$  NMR spectra of **1o** in  $\text{DMSO-}d_6$ .

**Fig. S2.** ESI-MS spectrum of **1o**.

**Fig. S3.** Fatigue resistance of **1o**.

**Fig. S4.** The binding constant of  $\text{Hg}^{2+}$  with **1o** was calculated to be  $0.42 \times 10^4 \text{ M}^{-1}$

**Fig. S5.** The detection limit of  $\text{Hg}^{2+}$  was calculated to be  $0.14 \mu\text{M}$ .

**Fig. S6.** Changes in fluorescence of **1o**- $\text{Hg}^{2+}$  induced by UV/vis lights.

**Fig. S7.**  $^1\text{H}$  NMR spectra measured during the titration of **1o** with  $\text{Hg}^{2+}$  in  $\text{DMSO-}d_6$ .

**Fig. S8.** Linear fitting of the absorption intensity at 555 nm vs  $\text{Cu}^{2+}$  concentration.

**Fig. S9.** The association constant of **1o** to  $\text{Cu}^{2+}$  was found to be  $1.76 \times 10^4 \text{ M}^{-1}$ .

**Fig. S10.** The detection limit for  $\text{Cu}^{2+}$  was estimated to be  $0.51 \mu\text{M}$

**Fig. S11.** Job's plot for determining the stoichiometry of **1o** and  $\text{Cu}^{2+}$ .

**Fig. S12.** ESI-MS spectrum of **1o** upon addition of  $\text{Cu}^{2+}$ .

**Fig. S13.**  $^1\text{H}$  NMR spectra measured during the titration of **1o** with  $\text{Cu}^{2+}$  in  $\text{THF-}d_8$ .

**Fig. S14.** Corresponding truth table of the combined logic circuit.

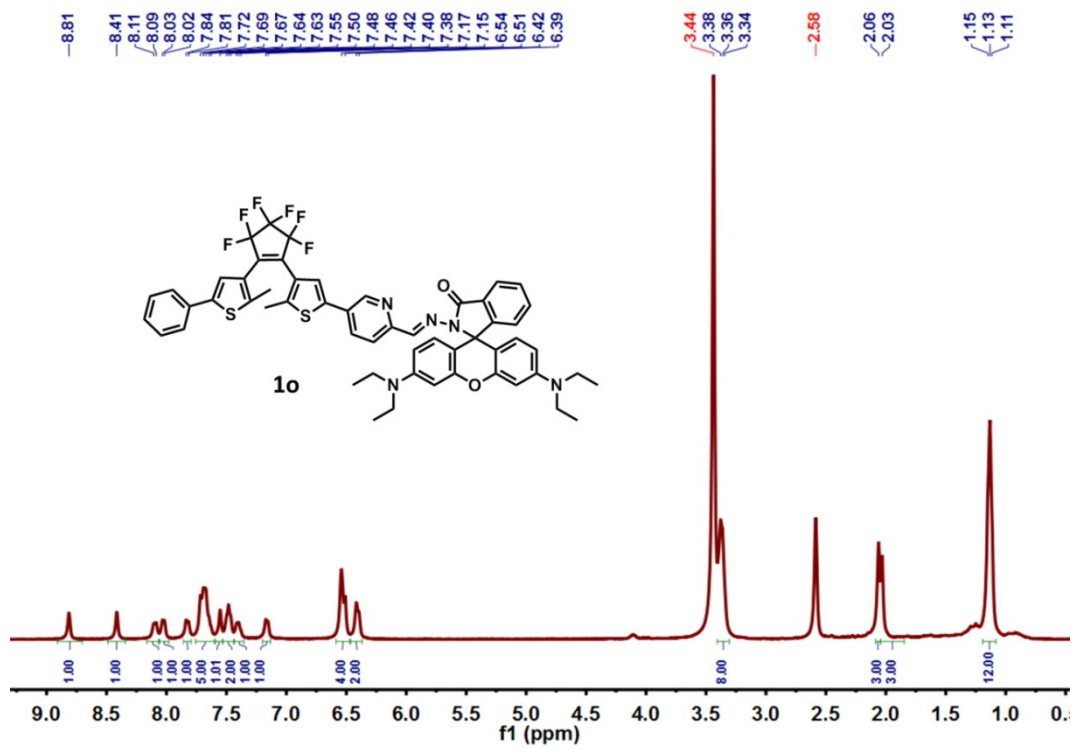

Fig S1

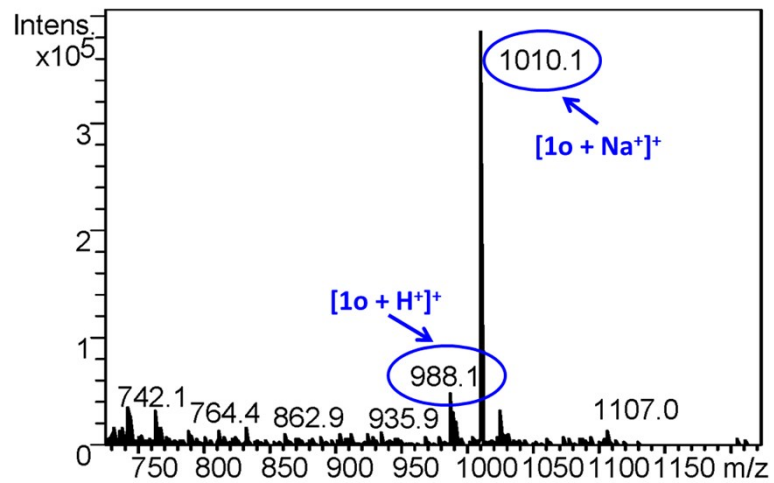

Fig S2

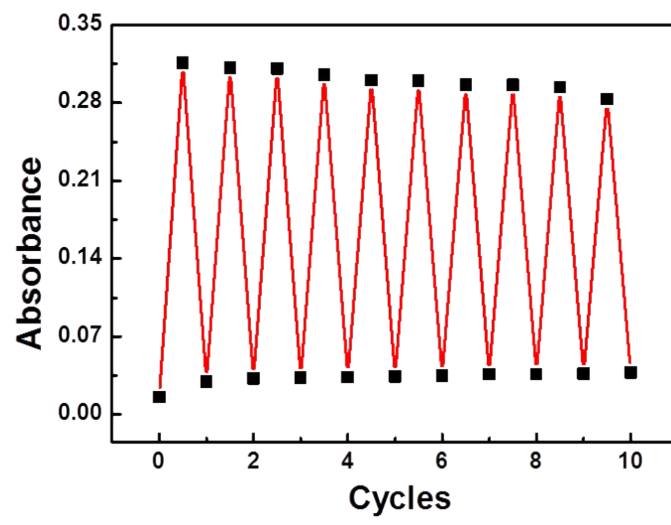

Fig. S3

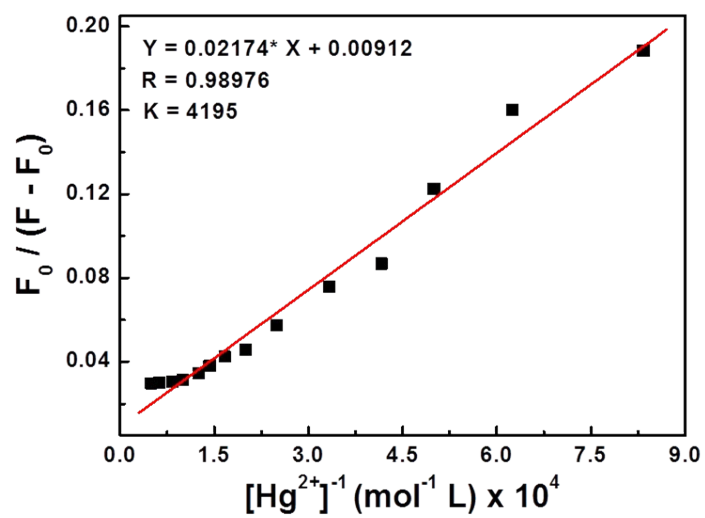

Fig. S4

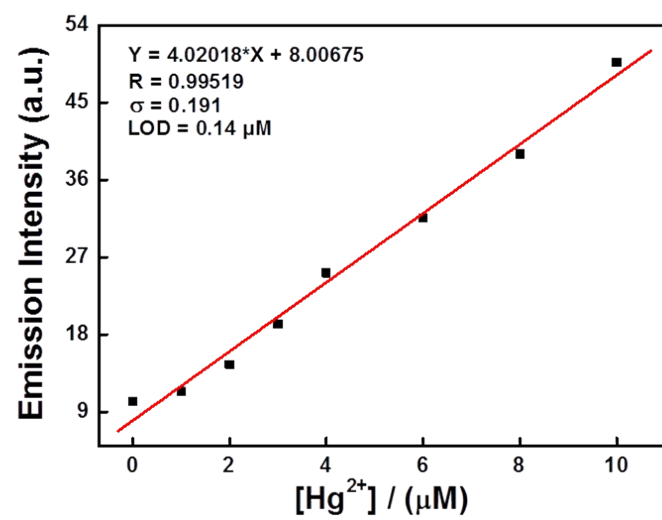

Fig. S5

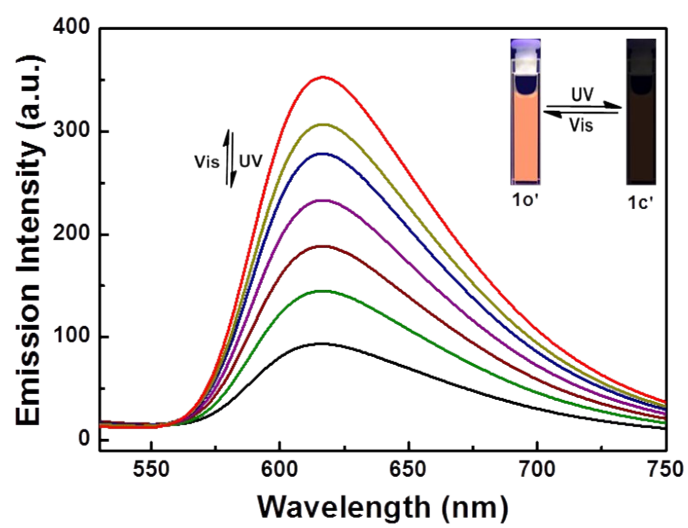

Fig. S6

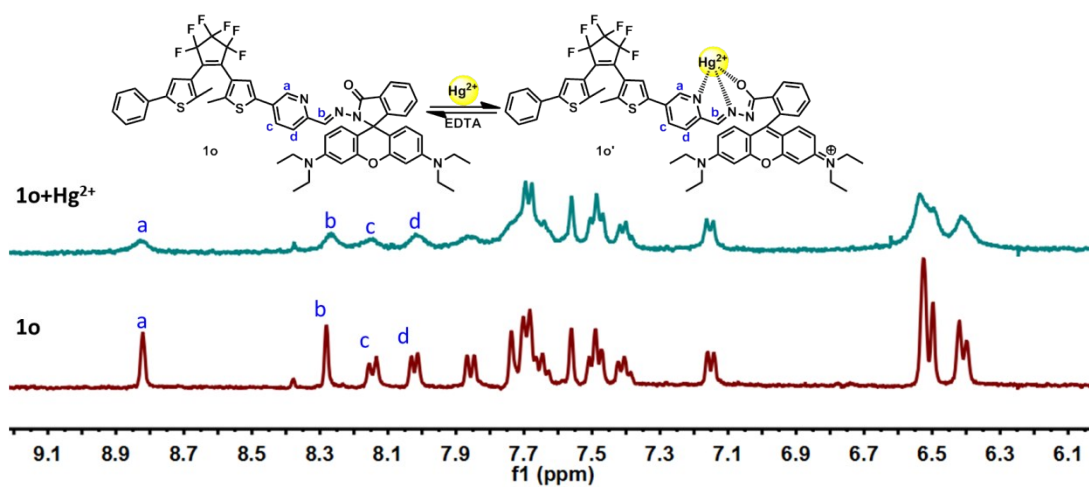

Fig. S7



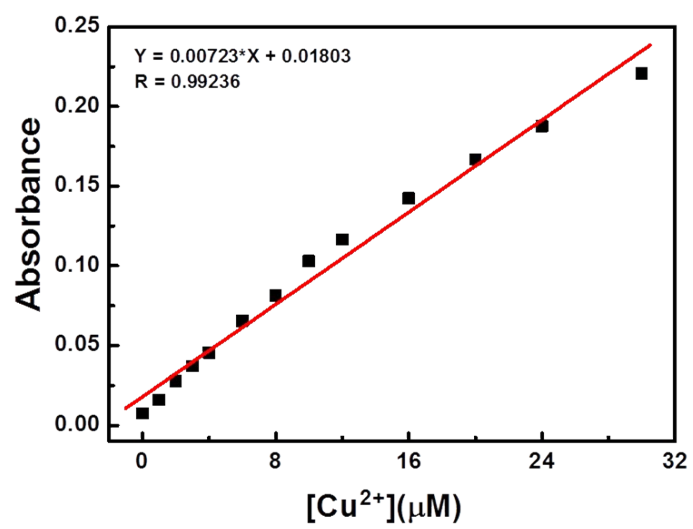

Fig S8

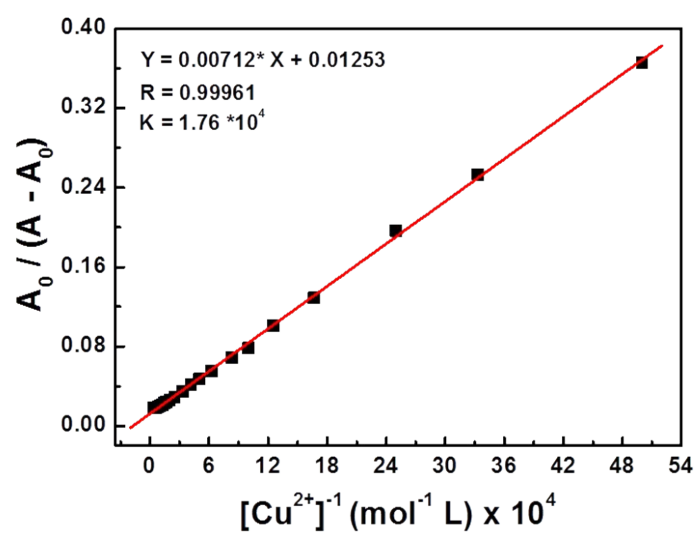

Fig. S9

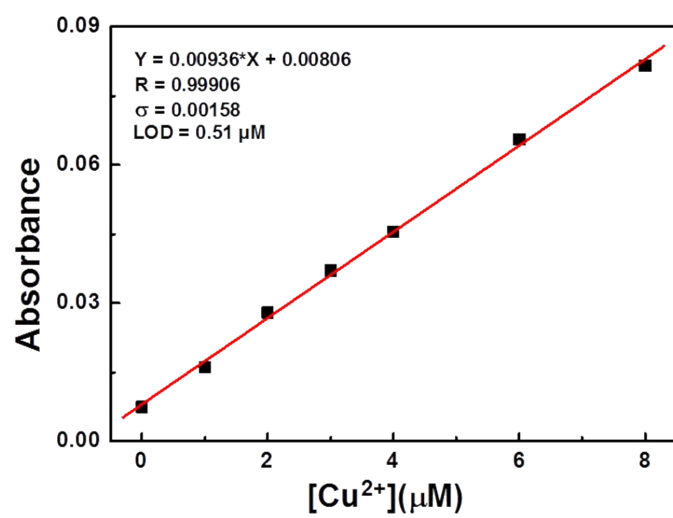

Fig. S10

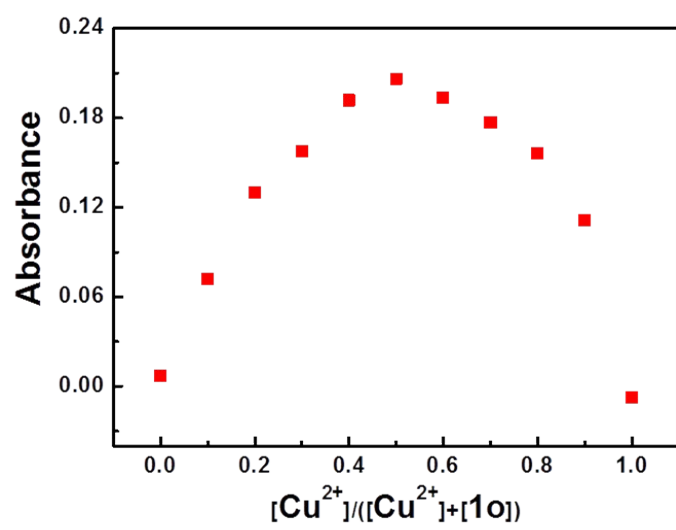

Fig S11

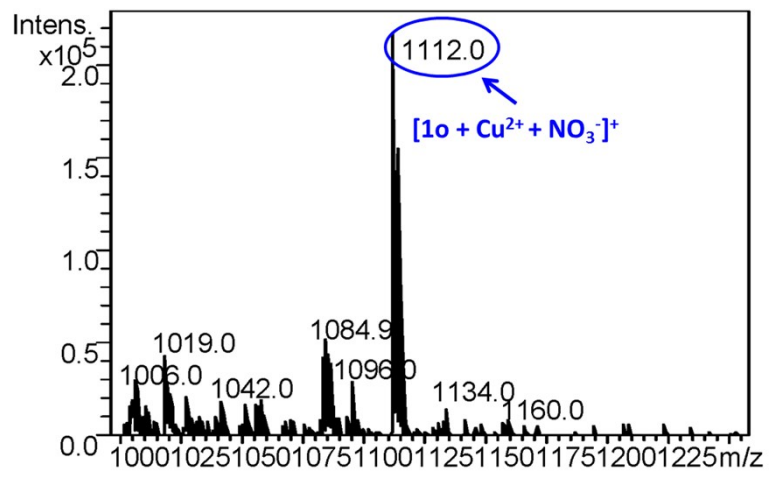

**Fig S12**

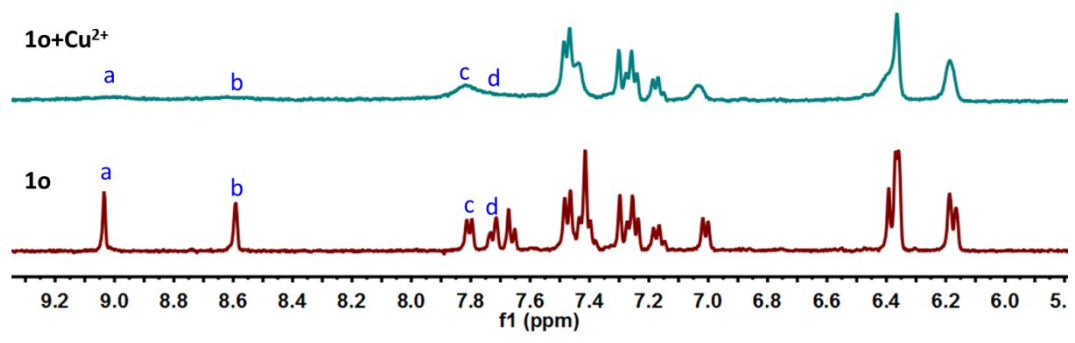

Fig S13

| Inputs    |            |                          |             | Output                      |
|-----------|------------|--------------------------|-------------|-----------------------------|
| In 1 (UV) | In 2 (Vis) | In 3 (Hg <sup>2+</sup> ) | In 4 (EDTA) | Out1 (F <sub>617 nm</sub> ) |
| 0         | 0          | 0                        | 0           | 0                           |
| 1         | 0          | 0                        | 0           | 0                           |
| 0         | 1          | 0                        | 0           | 0                           |
| 0         | 0          | 1                        | 0           | 1                           |
| 0         | 0          | 0                        | 1           | 0                           |
| 1         | 1          | 0                        | 0           | 0                           |
| 1         | 0          | 1                        | 0           | 0                           |
| 1         | 0          | 0                        | 1           | 0                           |
| 0         | 1          | 1                        | 0           | 1                           |
| 0         | 1          | 0                        | 1           | 0                           |
| 0         | 0          | 1                        | 1           | 0                           |
| 1         | 1          | 1                        | 0           | 1                           |
| 1         | 1          | 0                        | 1           | 0                           |
| 1         | 0          | 1                        | 1           | 0                           |
| 0         | 1          | 1                        | 1           | 0                           |
| 1         | 1          | 1                        | 1           | 0                           |

**Fig. S14**
